# Supplementary material for: Ascitic Interleukin 6 Is Associated with Poor Outcome and Spontaneous Bacterial Peritonitis: A Validation in Critically Ill Patients with Decompensated Cirrhosis
Source: MDPI journal article supplement (doi:10.3390/jcm9092865), 2020-09-04

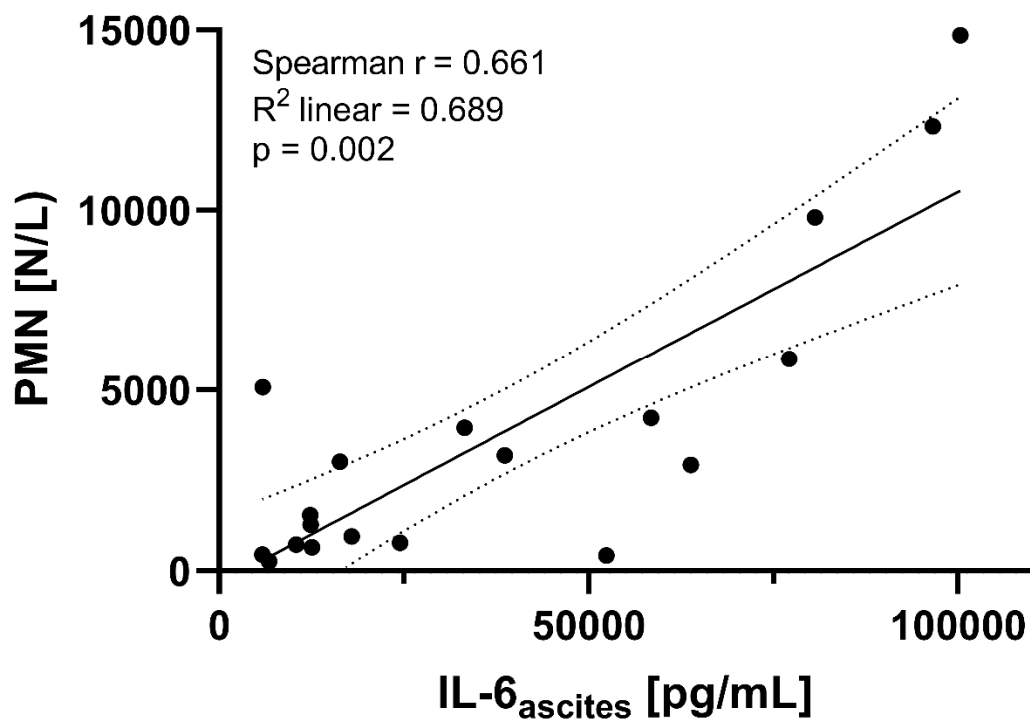

Figure 1. Correlation of ascitic Interleukin 6 (IL-6<sub>ascites</sub>) with ascitic polymorphonuclear neutrophils (PMN) in patients with spontaneous bacterial peritonitis ("SBP",  $n = 19$ ).



**Figure S3: Predictive value of baseline ascitic Interleukin 6 (IL-6<sub>ascites</sub>) compared to APACHE-II, SOFA, MELD, CTP and ACLF-Grade in identifying patients with need for hemodialysis therapy during ICU-stay**

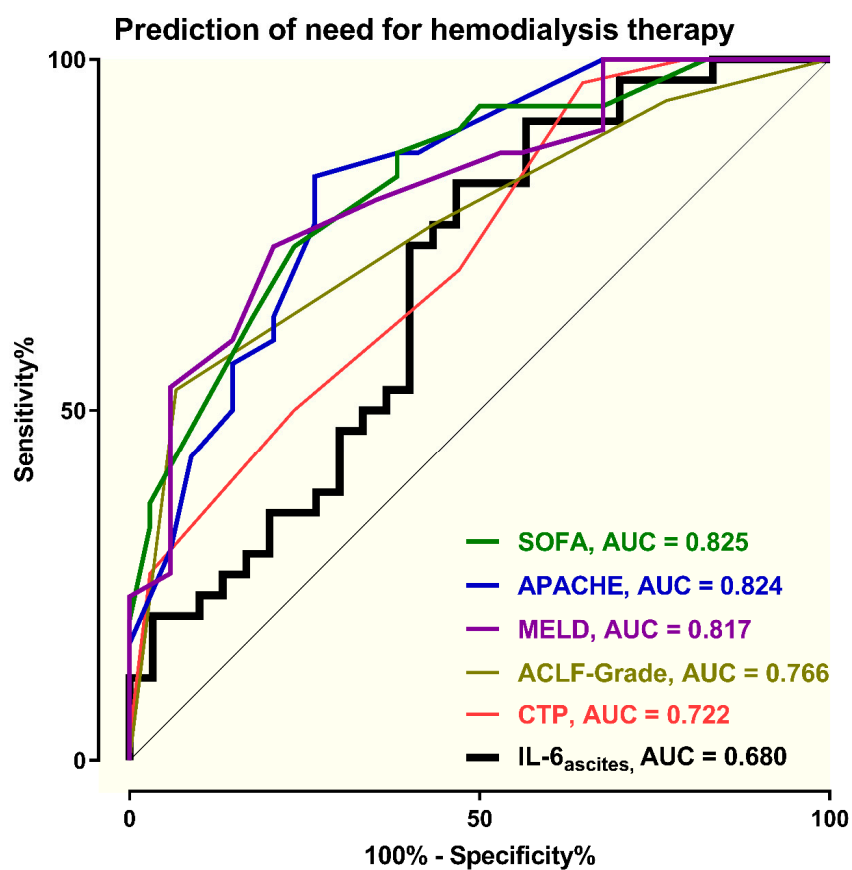

Supplement: s1 [file s1]
